# Supplementary material for: Effect of endothelial progenitor cell-derived extracellular vesicles on endothelial cell ferroptosis and atherosclerotic vascular endothelial injury
Source: PubMed Central journal article supplement (PMC8423825; doi:10.1038/s41420-021-00610-0), 2021-09-07
Supplement: 41420_2021_610_MOESM9_ESM.pdf [file 41420_2021_610_MOESM9_ESM.pdf]

Please complete the table below to indicate the contributions of all named authors to the figures.

Figure 1:

|  |
|--|
|  |
|--|

Figure 2:

|  |
|--|
|  |
|--|

Figure 3:

|  |
|--|
|  |
|--|

Figure 4:

|  |
|--|
|  |
|--|

Figure 5:

|  |
|--|
|  |
|--|

Figure 6:

|  |
|--|
|  |
|--|

Signed for and on behalf of the Author(s):

Qiang Li

Print Name:

Date:
